# Supplementary material
Source: publisher site journal article supplement (https://static.cambridge.org/content/id/urn:cambridge.org:id:article:S1049023X19004370/resource/name/S1049023X19004370supp002.docx)
Supplement: Supplementary file 1 [file S1049023X19004370supp002.docx]

| **Participants** | **Age** | **Qualification** | **Background** |
| --- | --- | --- | --- |
| 1 | 32 | Master’s in science | Nepal Police |
| 2 | 48 | PhD (Doctor of Philosophy) | Disaster Management |
| 3 | 56 | PhD (Doctor of Philosophy) | System Development |
| 4 | 39 | Masters in Crisis Management | Nepal Army |
| 5 | 37 | Master’s in Media Studies | Media Helpline |
| 6 | 55 | Master’s in Business Administration | Chief District officer |
| 7 | 48 | Master’s Degree | Nepal Police |
| 8 | 47 | Master’s Degree | Nepal Red Cross Society |
| 9 | 38 | PhD (Doctor of Philosophy) | Academics |
| 10 | 42 | Bachelor’s Degree | Nepal Red Cross Society |
| 11 | 58 | PhD (Doctor of Philosophy) | Disaster Management |

**Supplementary Table.** Demographics and Qualifications of Participants
